# Supplementary material for: A novel bat coronavirus reveals natural insertions at the S1/S2 cleavage site of the Spike protein and a possible recombinant origin of HCoV-19
Source: bioRxiv or medRxiv preprint supplement (doi:10.1101/2020.03.02.974139), 2020-03-11
Supplement: Supplementary file [file media-1.pdf]

# Supplementary materials

1

## 2 Methods

### 3 Sample collection

4 Between May and October, 2019, a total of 302 samples from 227 bats were collected from  
5 Mengla County, Yunnan Province in southern China (Extended Data Table 1). These bats  
6 belonged to 20 different species, with the majority of samples belonging to *Rhinolophus*  
7 *malayanus* (n=48, 21.1%), *Hipposideros larvatus* (n=41, 18.1%) and *Rhinolophus stheno* (n=39,  
8 17.2%). The samples included patagium (n=219), lung (n=2) and liver (n=3), and feces (n=78),  
9 all but three bats were sampled alive and subsequently released. All samples were first stored  
10 in RNAlater and then kept at -80°C until use.

### 11 Next generation sequencing

12 Based on the bat species primarily identified according to morphological criteria and  
13 confirmed through DNA barcoding, the 224 tissue and 78 fecal samples were merged into 38  
14 and 18 pools, respectively, with each pool including 1 to 11 samples of the same type  
15 (Extended Data Table 1). Samples were transferred into the RNAiso Plus reagent (TAKARA)  
16 for homogenization with steel beads. Total RNA was extracted and subsequently purified  
17 using EZNA Total RNA Kit (OMEGA). Libraries were constructed using the NEB Next Ultra RNA  
18 Library Prep Kit (NEB). rRNA of feces or tissues was removed using the TransNGS rRNA  
19 Depletion (Bacteria) Kit and TransNGS rRNA Depletion (Human/Mouse/Rat) Kit (TransGen),

20 respectively. Paired-end (150 bp) sequencing of each RNA library was performed on the  
21 NovaSeq 6000 platform (Illumina) carried out by Novogene Bioinformatics Technology  
22 (Beijing, China).

## 23 Genome assembly and annotation

24 Raw reads were obtained from the 56 pools and were then adaptor- and quality- trimmed  
25 with the Fastp program<sup>1</sup>. The clean reads were then mapped to reference genomes of  
26 representative CoV genomes using Bowtie 2<sup>2</sup>, including HCoV-19 (MDC60013002-01), SARS-  
27 CoV (AY508724, AY485277, AY390556 and AY278489), SARS-like-CoV (DQ084200,  
28 DQ648857, GQ153542, GQ153547, JX993987, JX993988, KF294455, KF294457, KJ473814,  
29 KJ473815, KJ473816, KT444582, KY417142, KY417145, KY417146, KY417148, KY417151,  
30 KY417152, KY770859, MK211374, MK211376, and MK211377), ZC45 (MG772933), ZXC21  
31 (MG772934), MERS-CoV (JX869059), other representative beta-CoV genomes (AY391777,  
32 EF065505, EF065509, EF065513, FJ647223, KC545386, KF636752, KM349744, KU762338, and  
33 MK167038) and alphacoronavirus genomes (NC\_002645, AY567487). 11954 and 64224 reads  
34 in pool No. 39 (a total of 78,477,464 clean reads) were mapped to both a bat coronavirus  
35 Cp/Yunnan2011 (JX993988)<sup>3</sup> and HCoV-19, generating two preliminary consensus sequences,  
36 termed BetaCoV/Rm/Yunnan/YN01/2019 (RmYN01) and BetaCoV/Rm/Yunnan/YN02/2019  
37 (RmYN02), respectively. However, there were only few reads in the remaining 55 pools that  
38 could be mapped to these reference CoV genomes. Pool 39 comprised 11 feces from  
39 *Rhinolophus malayanus* collected between May 6 and July 30, 2019.

40

41 To validate the two novel CoV genomes, the clean reads of pool 39 were then *de novo*  
42 assembled using Trinity<sup>4</sup> with default settings. The assembled contigs were compared with  
43 the consensus obtained in the previous step and merged using Geneious (version 11.1.5)  
44 (<https://www.geneious.com>). We found that contigs with high and low abundance  
45 corresponded to RmYN02 and RmYN01, respectively, with the abundance of RmYN02 5-10  
46 times higher than that of RmYN01. The gaps between contigs of RmYN02 were  
47 complemented by re-mapping the reads to the ends of the contigs, which produced the full-  
48 length genome sequence of RmYN02. However, due to the limited number of reads available,  
49 only a partial genome sequence of RmYN01 was obtained (23395 bp). Reads were then  
50 mapped to the full-length genome sequence of RmYN02 using Bowtie 2 to check base  
51 consistency at each nucleotide site. Moreover, to perform *de novo* assembly for pool 39 and  
52 to further distinguish RmYN01 and RmYN02, PeHaplo<sup>5</sup> was used with various overlap  
53 parameters (70, 80, 100, and 120). The consensus of each run of PeHaplo was then compared,  
54 generating the final full-length genome of RmYN02 (29671 bp). The sequence identity  
55 between RmYN01 and Cp/Yunnan2011 across the aligned regions was 96.9%, whereas that  
56 between RmYN01 and HCoV-19 was only 79.7%.

## 57 **Bioinformatics analyses**

58 Reference virus genomes were obtained from NCBI/GenBank (<https://www.ncbi.nlm.nih.gov/>)  
59 using Blastn with HCoV-19 as a query. The beta-CoVs from pangolins (Extended Data Table  
60 3) were retrieved from GISAID ([www.gisaid.org/](http://www.gisaid.org/)). The open reading frames (ORFs) of the  
61 verified genome sequences were predicted using Geneious (version 11.1.5). Pairwise

62 sequence identities were also calculated using Geneious. Potential recombination events were  
63 investigated using Simplot (version 3.5.1)<sup>6</sup>.

64

65 The three-dimensional structures of RBD from RmYN02, RaTG13, pangolin/GD and  
66 pangolin/GX were modeled using Swiss-Model program<sup>7</sup> using SARS CoV RBD structure (PDB:  
67 2DD8)<sup>8</sup> as a template.

68

69 Multiple sequence alignment of HCoV-19 and the reference sequences was performed using  
70 Mafft<sup>9</sup>. Phylogenetic analyses of the complete genome and major encoding regions were  
71 performed using RAxML<sup>10</sup> with 1000 bootstrap replicates, employing the GTR nucleotide  
72 substitution model (Fig. 3). Phylogenetic analysis was also performed using MrBayes<sup>11</sup>,  
73 employing the GTR nucleotide substitution model (Extended Data Figures 5-8). Ten million  
74 steps were run, with trees and parameters sampled every 1,000 steps.

## 75 Sanger sequencing

76 Based on the spike gene sequence of RmYN02, a TaqMan-based qPCR was performed to test  
77 the feces of pool 39 (Extended Data Table 2). Pool 39 comprised 11 feces from *Rhinolophus*  
78 *malayanus* collected between May 6 and July 30, 2019. However, only eight original samples  
79 were left after NGS. The results indicated that the fecal sample No. 123 from *R. malayanus*,  
80 collected on June 25<sup>th</sup>, 2019, was positive for RmYN02 (Extended Data Figure 1). To further  
81 confirm the S1/S2 cleavage site and the 1b (RdRp) gene sequence of RmYN02, five pair  
82 primers, F1/R1-F4/R4 and F6/R6, were designed for Sanger sequencing (Extended Data Table

83 2). The consensus gene sequence of Sanger sequencing of the amplified products was  
84 consistent with those from NGS (Extended Data Figure 2).

## 85 References

- 86 1 Chen, S., Zhou, Y., Chen, Y. & Gu, J. fastp: an ultra-fast all-in-one FASTQ preprocessor.  
87 *Bioinformatics* **34**, i884-i890, doi:10.1093/bioinformatics/bty560 (2018).
- 88 2 Langmead, B. & Salzberg, S. L. Fast gapped-read alignment with Bowtie 2. *Nat Methods*  
89 **9**, 357-359, doi:10.1038/nmeth.1923 (2012).
- 90 3 Wu, Z. *et al.* Deciphering the bat virome catalog to better understand the ecological  
91 diversity of bat viruses and the bat origin of emerging infectious diseases. *The ISME*  
92 *journal* **10**, 609-620, doi:10.1038/ismej.2015.138 (2016).
- 93 4 Grabherr, M.G. *et al.* Full-length transcriptome assembly from RNA-Seq data without a  
94 reference genome. *Nature biotechnology* **29**, 644-652, doi:10.1038/nbt.1883 (2011).
- 95 5 Chen, J., Zhao, Y. & Sun, Y. De novo haplotype reconstruction in viral quasispecies using  
96 paired-end read guided path finding. *Bioinformatics* **34**, 2927-2935,  
97 doi:10.1093/bioinformatics/bty202 (2018).
- 98 6 Lole, K. S. *et al.* Full-length human immunodeficiency virus type 1 genomes from subtype  
99 C-infected seroconverters in India, with evidence of intersubtype recombination. *J Virol*  
100 **73**, 152-160 (1999).
- 101 7 Waterhouse, A. *et al.* SWISS-MODEL: homology modelling of protein structures and  
102 complexes. *Nucleic Acids Res* **46**, W296-W303, doi:10.1093/nar/gky427 (2018).
- 103 8 Prabakaran, P. *et al.* Structure of severe acute respiratory syndrome coronavirus receptor-

- 104 binding domain complexed with neutralizing antibody. *The Journal of biological chemistry*  
105 **281**, 15829-15836, doi:10.1074/jbc.M600697200 (2006).
- 106 9 Nakamura, T., Yamada, K. D., Tomii, K. & Katoh, K. Parallelization of MAFFT for large-scale  
107 multiple sequence alignments. *Bioinformatics* **34**, 2490-2492,  
108 doi:10.1093/bioinformatics/bty121 (2018).
- 109 10 Stamatakis, A. RAxML version 8: a tool for phylogenetic analysis and post-analysis of large  
110 phylogenies. *Bioinformatics* **30**, 1312-1313, doi:10.1093/bioinformatics/btu033 (2014).
- 111 11 Ronquist, F. & Huelsenbeck, J. P. MrBayes 3: Bayesian phylogenetic inference under mixed  
112 models. *Bioinformatics* **19**, 1572-1574, doi:10.1093/bioinformatics/btg180 (2003).

113

## 114 Data availability

115 The sequences of RmYN01 and RmYN02 have also deposited in the GISAID with accession  
116 numbers: EPI\_ISL\_412976 and EPI\_ISL\_412977.

## 117 Acknowledgments

118 This work was supported by the Academic Promotion Programme of Shandong First Medical  
119 University (2019QL006 and 2019PT008), the Strategic Priority Research Programme of the  
120 Chinese Academy of Sciences (XDA19090118, XDB29010102 and XDA20050202), the Chinese  
121 National Natural Science Foundation (U1602265), the National Major Project for Control and  
122 Prevention of Infectious Disease in China (2017ZX10104001-006), and the High-End Foreign  
123 Experts Program of Yunnan Province (Y9YN021B01). W.S. was supported by the Taishan

124 Scholars Programme of Shandong Province (ts201511056). Y.B. is supported by the NSFC  
125 Outstanding Young Scholars (31822055) and Youth Innovation Promotion Association of CAS  
126 (2017122). E.C.H. is supported by an ARC Australian Laureate Fellowship (FL170100022). We  
127 thank all the scientists, especially Professor Wuchun Cao and Professor Yi Guan, who kindly  
128 shared their genomic sequences of the coronaviruses used in this study.

## 129 Author contributions

130 W.S., Y.B. and A.C.H. designed and supervised research. X.C. and A.C.H. collected the samples.  
131 H.Z. and Y.L. processed the samples. H.T. and J.L. performed genome assembly and  
132 annotation. H.Z., J.L. and T.H. performed the genome analysis and interpretation. W.S., Y.B.  
133 and A.C.H. wrote the paper. X.C., P.W., D.L., J.Y. and E.C.H. assisted in data interpretation and  
134 edited the paper.

## 135 Competing interests

136 The authors declare no competing interests.

137

138

139

140

141

142 Extended Data

143 Extended Data Figure 1. The detection result of the eight fecal samples of pool 39 for  
144 RmYN02 using real-time PCR primers and Taqman probe. Two replicates were set for each  
145 original sample.

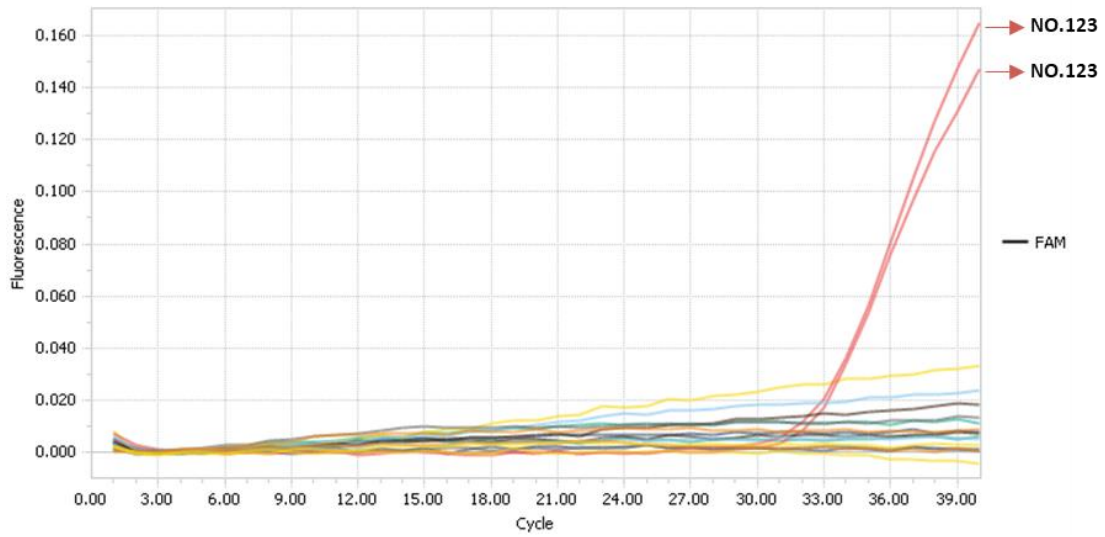

146  
147  
148  
149  
150  
151  
152  
153  
154  
155  
156  
157



158 **Extended Data Figure 2. Comparison of NGS consensus and Sanger sequencing of the**  
 159 **RBD and the cleavage site of RmYN02.** The insertion of the multiple amino acids at the  
 160 S1/S2 cleavage site is highlighted.

161

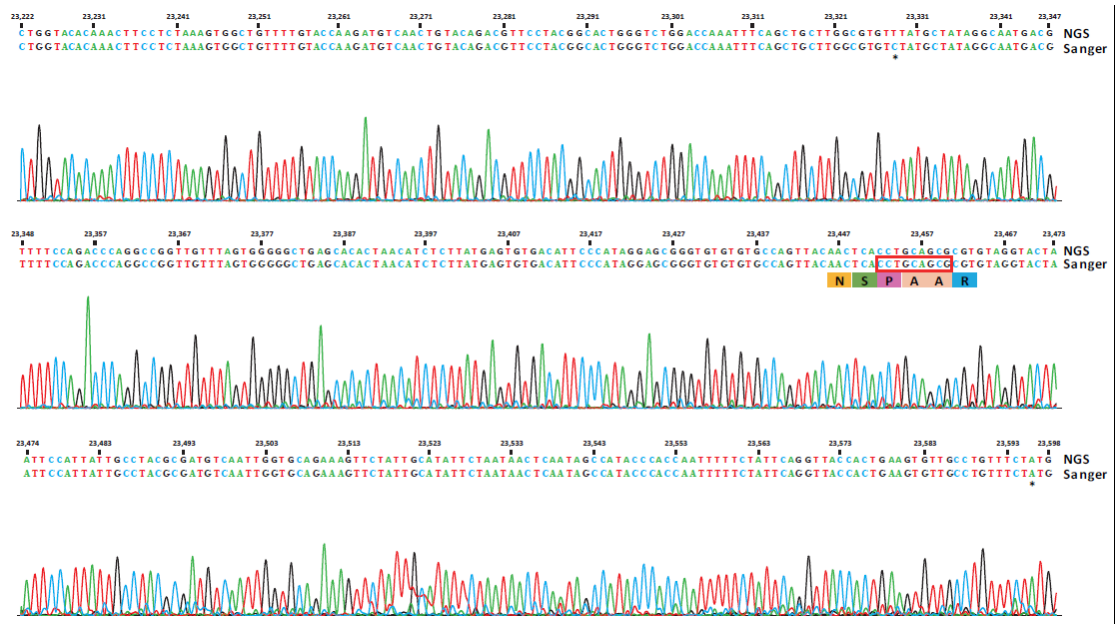

162

163

164

165

166

167

168

169

170

171

172

173

174 **Extended Data Figure 3. Sites in the RmYN02 genome that display nucleotide**  
 175 **polymorphisms in the NGS data.** The positions of these sites in RmYN02 were provided at  
 176 the bottom of the figure. “/”: Sanger sequencing was not performed.

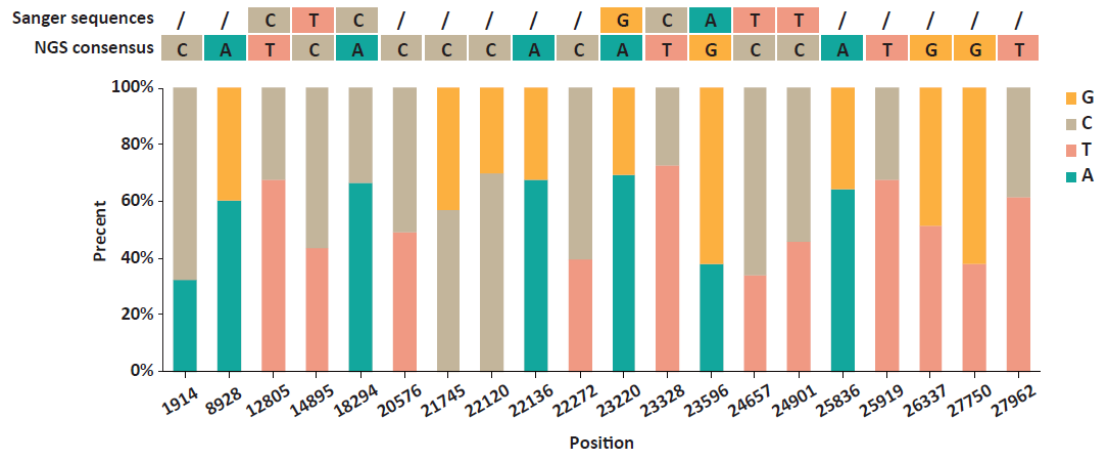

177  
 178  
 179  
 180  
 181  
 182  
 183  
 184  
 185  
 186  
 187  
 188  
 189  
 190

191 Extended Data Figure 4. Sequence alignment of the RBDs from RmYN02 and  
 192 representative beta-CoVs. The blue triangles indicate amino acids from the SARS-CoV S  
 193 protein that impact binding to ACE2. The yellow rectangles highlight the three deletions in  
 194 sequence resulting two loops shorten in RmYN02.

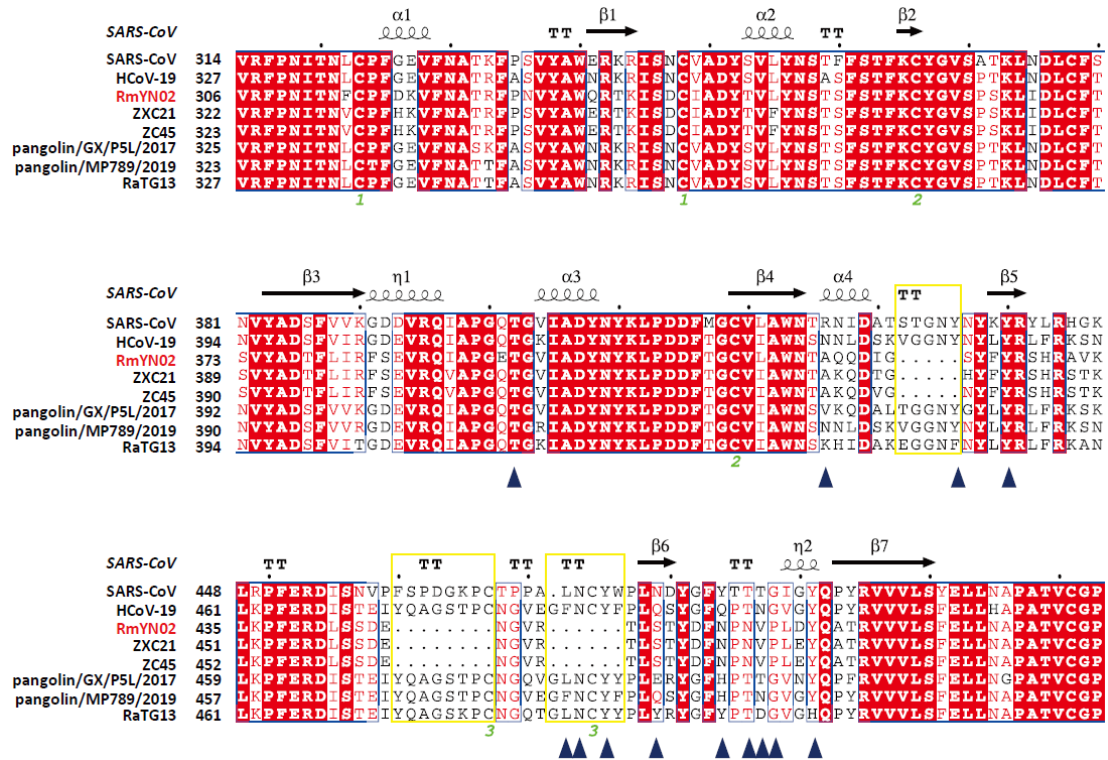

195  
 196  
 197  
 198  
 199  
 200  
 201  
 202  
 203  
 204

205 **Extended Data Figure 5. Bayesian phylogenetic analysis of the full-length virus genome**  
 206 **of HCoV-19 and representative viruses of the subgenus *Sarbecoronavirus*.** Phylogenetic  
 207 analysis was also performed using MrBayes, employing the GTR nucleotide substitution model.  
 208 Ten million steps were run, with trees and parameters sampled every 1,000 steps. The tree is  
 209 midpoint rooted for clarity.

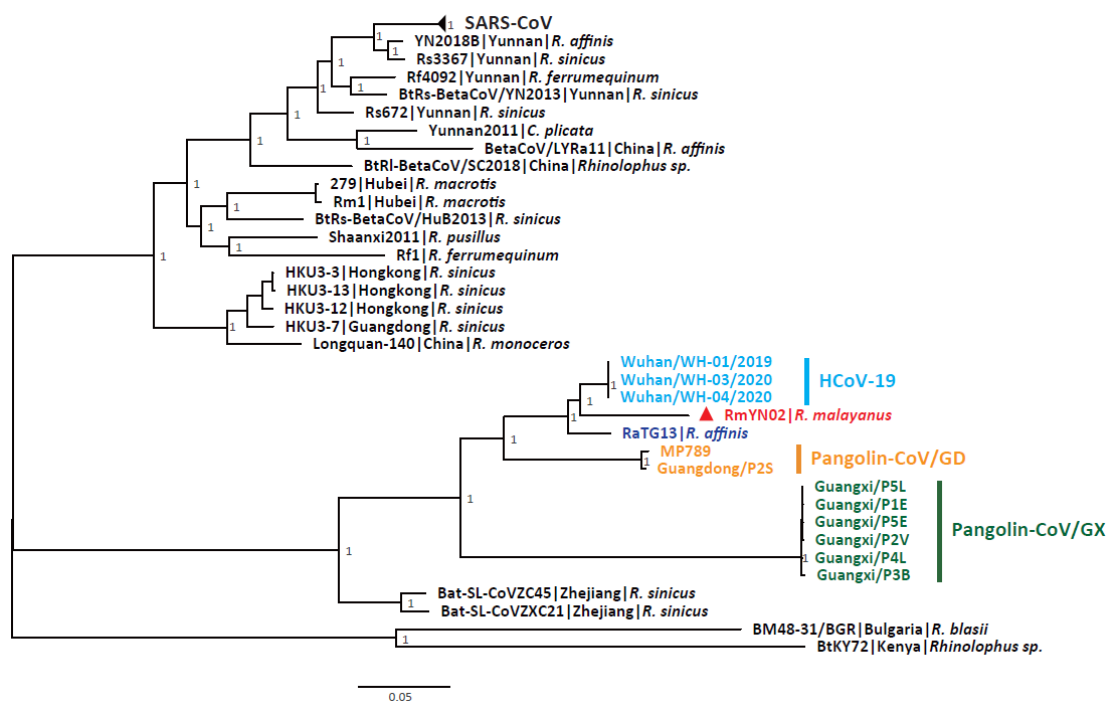

210  
 211  
 212  
 213  
 214  
 215  
 216  
 217  
 218

219 **Extended Data Figure 6. Bayesian phylogenetic analysis of the spike gene of HCoV-19**  
 220 **and representative viruses of the subgenus *Sarbecoronavirus*.** Phylogenetic analysis was  
 221 also performed using MrBayes, employing the GTR nucleotide substitution model. Ten million  
 222 steps were run, with trees and parameters sampled every 1,000 steps. The tree is midpoint  
 223 rooted for clarity.

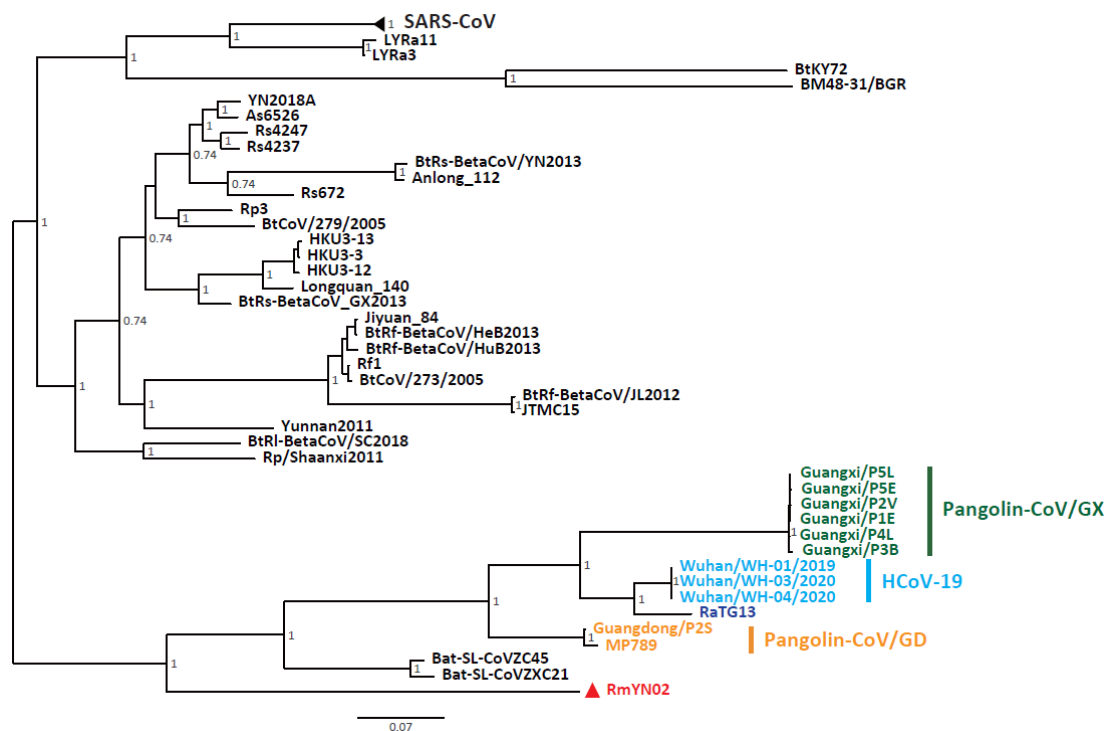

224  
 225  
 226  
 227  
 228  
 229  
 230  
 231  
 232

233 **Extended Data Figure 7. Bayesian phylogenetic analysis of the RBD of HCoV-19 and**  
 234 **representative viruses of the subgenus *Sarbecoronavirus*.** RBD is delimited as the gene  
 235 region 991-1572 of the spike gene according to the reference<sup>7</sup>. Phylogenetic analysis was  
 236 also performed using MrBayes, employing the GTR nucleotide substitution model. Ten million  
 237 steps were run, with trees and parameters sampled every 1,000 steps. The tree is midpoint  
 238 rooted for clarity.

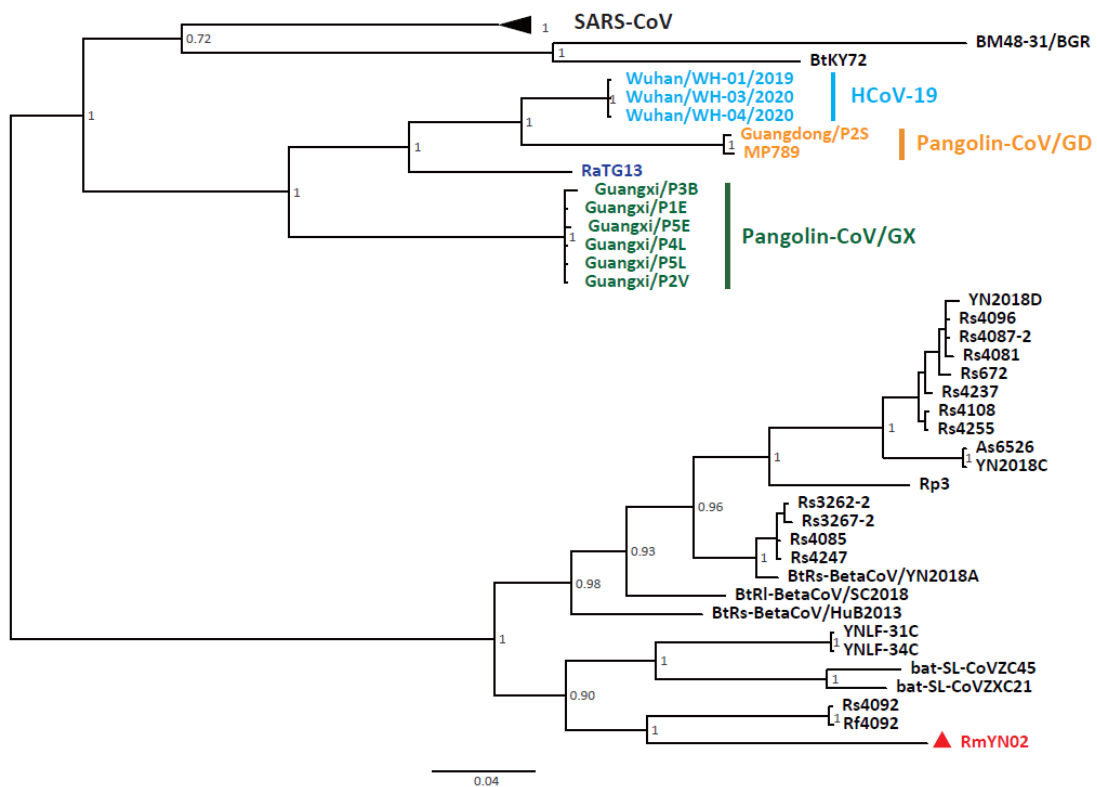

239  
 240  
 241  
 242  
 243  
 244  
 245  
 246

247 **Extended Data Figure 8. Bayesian phylogenetic analysis of the RdRp gene of HCoV-19**  
 248 **and representative viruses of the subgenus *Sarbecoronavirus*.** Phylogenetic analysis was  
 249 also performed using MrBayes, employing the GTR nucleotide substitution model. Ten million  
 250 steps were run, with trees and parameters sampled every 1,000 steps. The tree is midpoint  
 251 rooted for clarity.

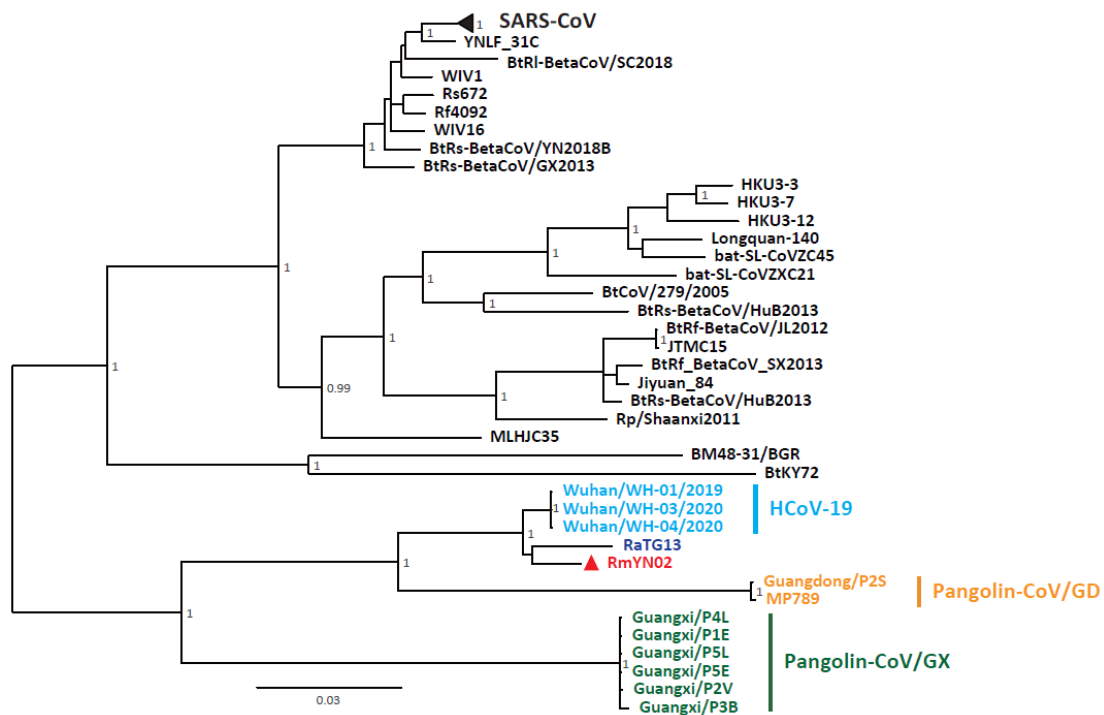

252  
 253  
 254  
 255  
 256  
 257  
 258  
 259  
 260

261 Extended Data Table 1. Summary of the bat samples collected in the present study and

262 the pooling strategy used for next-generation sequencing.

| Species                                             | Individual number |     |     |     |     |     |         | Number of Libraries | Sample number              |          |      |       |       |
|-----------------------------------------------------|-------------------|-----|-----|-----|-----|-----|---------|---------------------|----------------------------|----------|------|-------|-------|
|                                                     | May               | Jun | Jul | Aug | Sep | Oct | May-Oct |                     | Samples per library        | Patagium | Lung | Liver | Feces |
| <i>Rhinolophus malayanus</i> <sup>a</sup>           | 6                 | 24  | 9   |     |     |     | 39      | 5                   | 10, 10, 8, 9, 11           | 37       |      |       | 11    |
| <i>Rhinolophus stheno</i> <sup>a</sup>              | 14                | 12  | 16  | 6   |     |     | 48      | 7                   | 10, 5, 10, 10, 9, 7, 9     | 44       |      |       | 16    |
| <i>Hipposideros larvatus (complex)</i> <sup>a</sup> | 4                 | 8   | 12  | 5   | 7   | 5   | 41      | 8                   | 10, 10, 10, 10, 7, 7, 1, 1 | 40       | 1    | 1     | 14    |
| <i>Rhinolophus sinicus</i> <sup>a</sup>             | 4                 | 4   | 4   | 3   | 2   |     | 17      | 3                   | 10, 7, 8                   | 17       |      |       | 8     |
| <i>Myotis laniger</i> <sup>a</sup>                  | 7                 |     | 2   |     |     |     | 9       | 1                   | 9,                         | 9        |      |       |       |
| <i>Rhinolophus siamensis</i> <sup>a</sup>           | 1                 | 3   | 1   | 2   |     | 1   | 8       | 2                   | 8, 3                       | 8        |      |       | 3     |
| <i>Hipposideros pomona</i> <sup>a</sup>             | 1                 |     | 4   | 7   | 1   |     | 13      | 3                   | 8, 5, 8                    | 13       |      |       | 7     |
| <i>Kerivoula hardwickii</i> <sup>a</sup>            | 1                 |     |     | 1   | 1   |     | 3       | 1                   | 3,                         | 3        |      |       | 1     |
| <i>Murina cyclotis</i> <sup>a</sup>                 | 1                 | 2   | 2   | 2   |     |     | 7       | 2                   | 7, 3                       | 7        |      |       | 3     |
| <i>Aselliscus stoliczkanus</i> <sup>a</sup>         | 1                 |     |     | 2   | 1   | 1   | 5       | 2                   | 5, 3                       | 5        |      |       | 3     |
| <i>Myotis muricola</i> <sup>a</sup>                 |                   | 3   | 1   | 2   | 1   | 1   | 8       | 1                   | 8,                         | 8        |      |       |       |
| <i>Kerivoula sp.</i> <sup>a</sup>                   | 2                 |     |     |     |     |     | 2       | 2                   | 2, 1                       | 2        |      |       | 1     |
| <i>Rhinolophus paradoxolophus</i> <sup>a</sup>      | 1                 |     |     |     |     |     | 1       | 2                   | 1, 1                       | 1        |      |       | 1     |
| <i>Kerivoula papillosa</i> <sup>a</sup>             |                   |     | 1   | 1   |     |     | 2       | 1                   | 2,                         | 2        |      |       |       |



|                                            |    |    |    |    |    |    |   |    |            |     |   |   |    |
|--------------------------------------------|----|----|----|----|----|----|---|----|------------|-----|---|---|----|
| <i>Tylonycteris robustula</i> <sup>a</sup> |    | 1  |    |    |    |    | 1 | 1  | 1,         | 1   |   |   |    |
| <i>Harpiocephalus harpia</i> <sup>a</sup>  |    |    |    | 1  |    |    | 1 | 2  | 1, 1       | 1   |   |   | 1  |
| <i>Hipposideros armiger</i> <sup>a</sup>   |    |    |    |    | 1  | 2  | 3 | 3  | 2, 1, 1    | 3   |   |   | 1  |
| <i>Rhinolophus pearsonii</i> <sup>a</sup>  |    |    |    | 3  |    | 3  | 6 | 3  | 6, 2, 3    | 6   |   |   | 5  |
| <i>Chaerephon plicata</i> <sup>b</sup>     |    |    | 4  |    |    |    | 4 | 3  | 4, 2, 1    | 4   |   | 1 | 2  |
| <i>Taphozous melanopogon</i> <sup>b</sup>  |    |    | 9  |    |    |    | 9 | 4  | 8, 1, 1, 1 | 8   | 1 | 1 | 1  |
| Total                                      | 43 | 57 | 65 | 35 | 14 | 13 |   | 56 |            | 219 | 2 | 3 | 78 |

263 Note: <sup>a</sup>Samples were collected from Mengla, Xishuangbanna, Yunan (101.27156323E,  
264 21.91889683N).

265 <sup>b</sup>Samples were collected from Mengla, Xishuangbanna, Yunan (21.5932019N, 101.2200914E).

266 Different colors represent different sample types. Patagium, black; Lung, purple; Liver, blue; Feces,  
267 red.

268

269

270

271

272

273

274

275

276

277 **Extended Data Table 2. Oligonucleotide primers designed to detect RmYN02 and to**  
 278 **amplify the spike and 1b genes.**

| Primers (nucleotide positions) <sup>a</sup> | Sequence, 5'→3'              | Product length, bp |
|---------------------------------------------|------------------------------|--------------------|
| Forward qF (21344-21366)                    | ACCCAATTCAGTTGTCTTCCTAT      | 146                |
| Reverse qR (21469-21489)                    | TCTAACGATGAGCCTACCCTT        |                    |
| Probe qP (21411-21438)                      | TGCTGTTATGTCTCTTAAGGAGGGACAA |                    |
| Forward F6 (23070-23092)                    | TGGTGTCTAACTGATTCAGATA       | 2370               |
| Reverse R6 (25418-25439)                    | TCTCTTTTTAAGGGTTATGATT       |                    |
| Forward F1 (12002-12024)                    | CTTCCATGCAGGGTGCTGTAGA       | 1488               |
| Reverse R1 (13470-13489)                    | CGCACGGTGTAAAGACGGGCT        |                    |
| Forward F2 (13159-13180)                    | TGGTCAGGCAATAACAGTTACA       | 2579               |
| Reverse R2 (14332-14354)                    | GCACAATGCAGAATGCATCTA        |                    |
| Forward F3 (15625-15646)                    | AGAGATGTTGACACAGACTTTG       | 1788               |
| Reverse R3 (17310-17412)                    | GTACACATAGTGCTTAGCACGTA      |                    |
| Forward F4 (17321-17345)                    | CAGATATAGTTGTCTTTGATGAAAT    | 1937               |
| Reverse R4 (19236-19257)                    | AGGCAAGTTAAGGTTAGATAGC       |                    |

279 <sup>a</sup>Values in parentheses indicate primer positions corresponding to the genome sequence of

280 RmYN02.

281

282

283

284

285 **Extended Data Table 3. Acknowledgement of sharing of HCoV-19 genome sequences**  
 286 **from the GISAID and GenBank databases. We gratefully thank the authors listed below for**  
 287 **sharing their genomic sequences of coronaviruses analyzed in this study.**

| Accession ID   | Virus name                        | Location                      | Collection date | Originating lab                                          | Submitting lab                                           | Authors                                                                              |
|----------------|-----------------------------------|-------------------------------|-----------------|----------------------------------------------------------|----------------------------------------------------------|--------------------------------------------------------------------------------------|
| EPI_ISL_402131 | BetaCoV/bat/Yunnan/RaTG 13/2013   | Asia / China / Yunnan / Pu'er | 2013-07-24      | Wuhan Institute of Virology, Chinese Academy of Sciences | Wuhan Institute of Virology, Chinese Academy of Sciences | Yan Zhu, Ping Yu, Bei Li, Ben Hu, Hao-Rui Si, Xing-Lou Yang, Peng Zhou, Zheng-Li Shi |
| EPI_ISL_410539 | BetaCoV/pangolin/Guangxi/P1E/2017 | Asia / China / Guangxi        | 2017            | Beijing Institute of Microbiology and Epidemiology       | Beijing Institute of Microbiology and Epidemiology       | Wu-Chun Cao; Tommy Tsan-Yuk Lam; Na Jia; Ya-Wei Zhang; Jia-Fu Jiang; Bao-Gui Jiang   |
| EPI_ISL_410541 | BetaCoV/pangolin/Guangxi/P5E/2017 | Asia / China / Guangxi        | 2017            | Beijing Institute of Microbiology and Epidemiology       | Beijing Institute of Microbiology and Epidemiology       | Wu-Chun Cao; Tommy Tsan-Yuk Lam; Na Jia; Ya-Wei Zhang; Jia-Fu Jiang; Bao-Gui Jiang   |
| EPI_ISL_410540 | BetaCoV/pangolin/Guangxi/P5L/2017 | Asia / China / Guangxi        | 2017            | Beijing Institute of Microbiology and Epidemiology       | Beijing Institute of Microbiology and Epidemiology       | Wu-Chun Cao; Tommy Tsan-Yuk Lam; Na Jia; Ya-Wei Zhang; Jia-Fu Jiang; Bao-Gui Jiang   |
| EPI_ISL_410538 | BetaCoV/pangolin/Guangxi/P4L/2017 | Asia / China / Guangxi        | 2017            | Beijing Institute of Microbiology and Epidemiology       | Beijing Institute of Microbiology and Epidemiology       | Wu-Chun Cao; Tommy Tsan-Yuk Lam; Na Jia; Ya-Wei                                      |

|                    |                                                 |                                |                |                                                             |                                                             |                                                                                                |
|--------------------|-------------------------------------------------|--------------------------------|----------------|-------------------------------------------------------------|-------------------------------------------------------------|------------------------------------------------------------------------------------------------|
|                    |                                                 |                                |                |                                                             |                                                             | Zhang; Jia-Fu Jiang;<br>Bao-Gui Jiang                                                          |
| EPI_ISL_<br>410543 | BetaCoV/<br>pangolin/<br>Guangxi/P3B/<br>2017   | Asia /<br>China /<br>Guangxi   | 2017           | Beijing Institute<br>of Microbiology<br>and<br>Epidemiology | Beijing Institute<br>of Microbiology<br>and<br>Epidemiology | Wu-Chun Cao;<br>Tommy Tsan-Yuk<br>Lam; Na Jia; Ya-Wei<br>Zhang; Jia-Fu Jiang;<br>Bao-Gui Jiang |
| EPI_ISL_<br>410542 | BetaCoV/<br>pangolin/<br>Guangxi/P2V/<br>2017   | Asia /<br>China /<br>Guangxi   | 2017           | Beijing Institute<br>of Microbiology<br>and<br>Epidemiology | Beijing Institute<br>of Microbiology<br>and<br>Epidemiology | Wu-Chun Cao;<br>Tommy Tsan-Yuk<br>Lam; Na Jia; Ya-Wei<br>Zhang; Jia-Fu Jiang;<br>Bao-Gui Jiang |
| EPI_ISL_<br>410544 | BetaCoV/<br>pangolin/<br>Guangdong<br>/P2S/2019 | Asia /<br>China /<br>Guangdong | 2019           | Beijing Institute<br>of Microbiology<br>and<br>Epidemiology | Beijing Institute<br>of Microbiology<br>and<br>Epidemiology | Wu-Chun Cao;<br>Tommy Tsan-Yuk<br>Lam; Na Jia; Ya-Wei<br>Zhang; Jia-Fu Jiang;<br>Bao-Gui Jiang |
| MT0840<br>71.1     | MP789                                           | China                          | 2019-03-<br>29 |                                                             | Chinese<br>Academy of<br>Fishery Sciences<br>(SCSFRI, CAFS) | Jiang, J.-Z., Liu, P.<br>and Chen, J.-P.                                                       |
